# Supplementary material for: Thermodynamic Insights into the Separation of Carotenoids in Reversed-Phase Liquid Chromatography
Source: Hindawi journal article supplement (doi:10.1155/2019/7535813), 2019-01-03
Supplement: f1 [file 7535813.f1.pdf]

# Thermodynamic insights into the separation of carotenoids in reversed-phase liquid chromatography

Nicola Marchetti\*, Pier Paolo Giovannini, Martina Catani,  
Luisa Pasti, Alberto Cavazzini

*Department of Chemistry and Pharmaceutical Sciences,  
University of Ferrara, Italy*

## Supplementing Material

### Tracer Pulse Chromatography

According to the tracer pulse (TP) method for a binary system, operational definitions of the excess volume of the isotopically labeled  $i$  compound,  $V_i^{exc}$ , and of the thermodynamic void volume,  $V_0$ , are:

$$V_i^{exc} = (V_{R,i}^* - V_{R,j}^*)\theta_i^M\theta_j^M \quad (1)$$

and

$$V_0 = V_{R,i}^*\theta_i^M + V_{R,j}^*\theta_j^M \quad (2)$$

where  $V_{R,i}^*$  and  $V_{R,j}^*$  are the elution volumes for each labeled component  $i$  and  $j$ , and  $\theta_i^M$  and  $\theta_j^M$  are the volume fractions in the bulk mobile phase. Excess adsorption isotherms can be employed to estimate the capacity and thickness of the surface phase (absolute adsorption). The volume of  $i$  in the stationary phase,  $V_i^S$ , and the stationary phase volume,  $V_S$ , can be assessed by the linear region of the excess isotherm, being

$$V_i^{exc} = V_i^S - V_S\theta_i^M \quad (3)$$

According to eq.2,  $V_0$  is obtained by injecting small samples of eluent with isotopically labeled solute components and determining the elution volumes (i.e.,  $V_{R,i}^*$  and  $V_{R,j}^*$ ) for each labeled component. Obviously, the method can be used with a pure eluent (i.e.,  $\theta_i^M$  or  $\theta_j^M = 1$ ) and this is by far the simplest way of determining  $V_0$ .

---

\*Corresponding author: nicola.marchetti@unife.it (N. Marchetti)

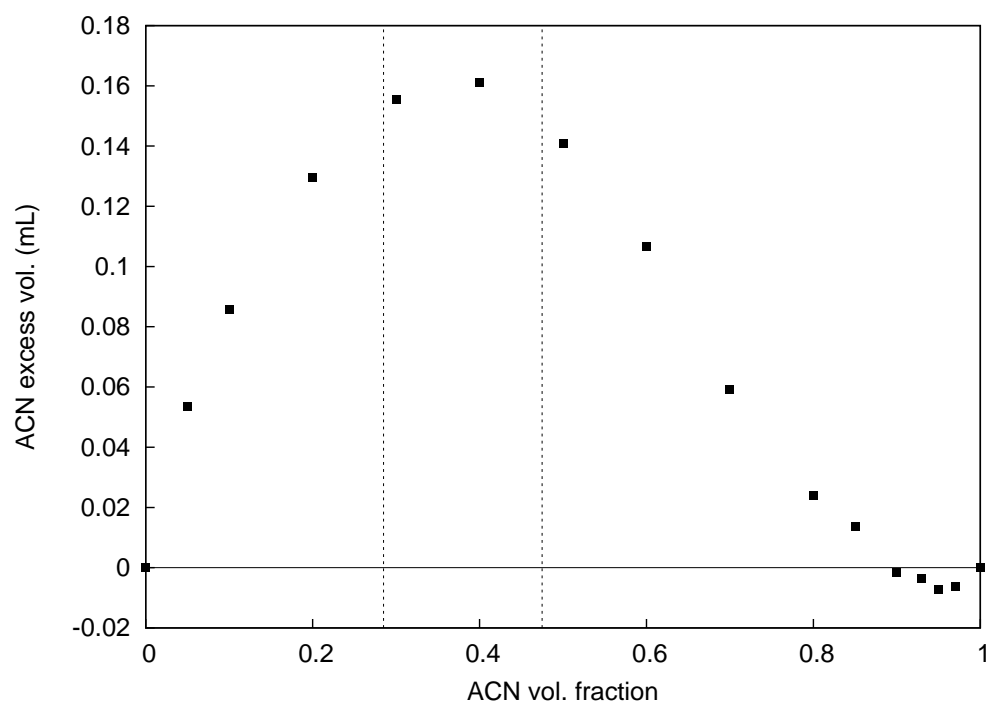

**Figure S1.** Acetonitrile excess isotherm. Vertical dashed lines indicate the region within ACN volume fraction are investigated.

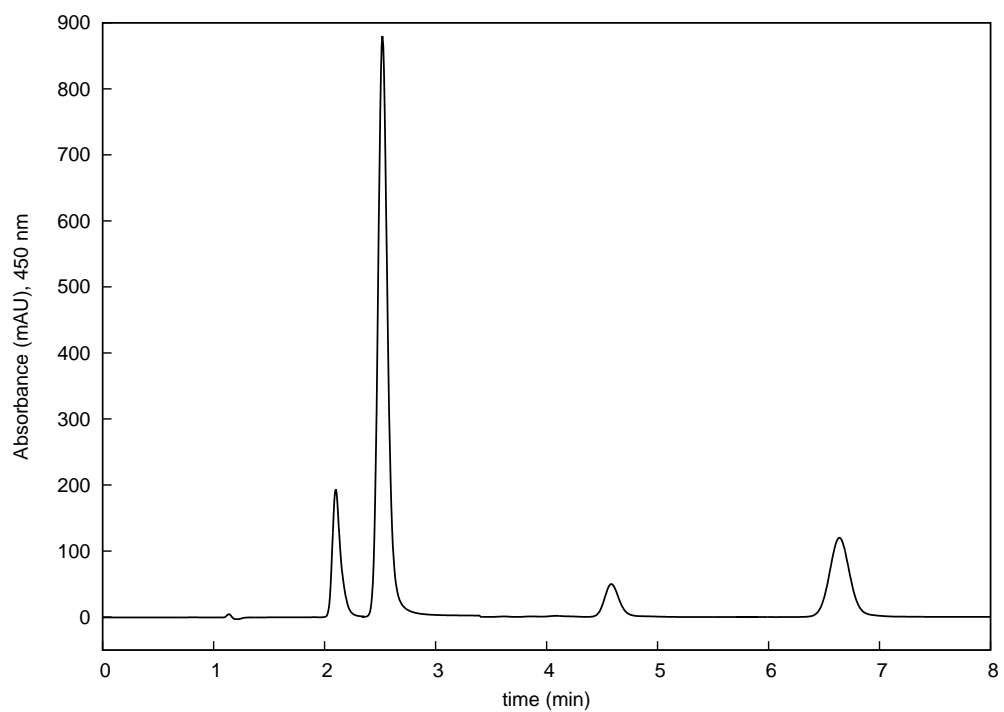

**Figure S2.** HPLC separation between lutein, zeaxanthin, lycopene and  $\beta$ -carotene. Chromatographic conditions were: column temperature 30°C; MeOH:ACN:DCM 57:38:5.

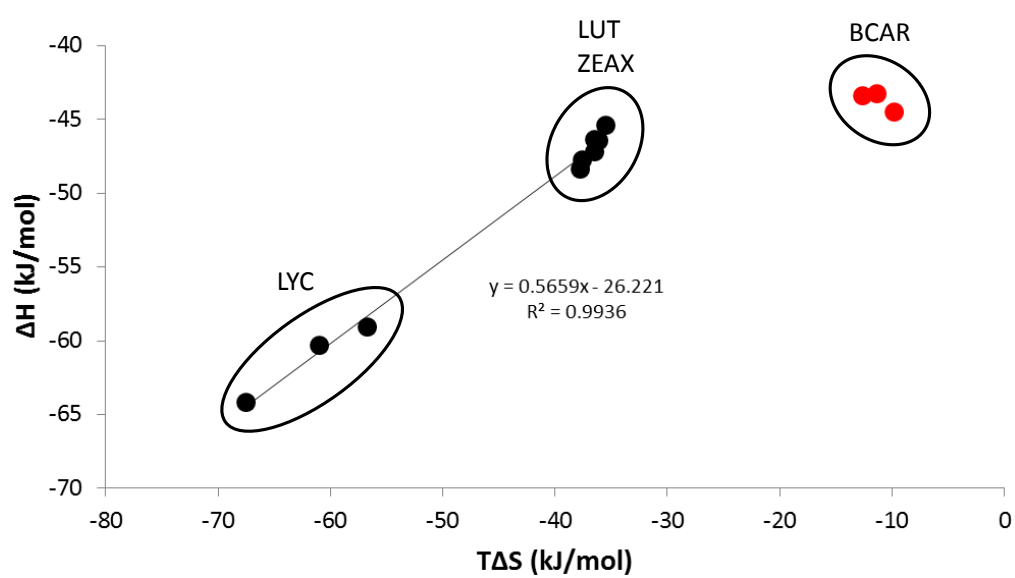

**Figure S3.** Evidence of enthalpy-entropy compensation for lutein, zeaxanthin and lycopene.
